# Supplementary material for: Design and screening of a NORR electrocatalyst with co-coordinating active centers of the support and coordination atoms: a machine learning descriptor for quantifying eigen properties
Source: Royal Society of Chemistry journal article supplement (doi:10.1039/d4ta00570h), 2024-01-01
Supplement: d4ta00570h1.pdf [file d4ta00570h1.pdf]

Table S1.  $\Delta G^*H$  of all

SACs

| SACs                                 | $\Delta G^*H$ |
|--------------------------------------|---------------|
| MoS <sub>2</sub> _N <sub>3</sub> _Sc | 0.086         |
| Ti                                   | -0.62         |
| V                                    | -0.87         |
| Cr                                   | -0.95         |
| Mn                                   | -0.41         |
| Fe                                   | -0.40         |
| Co                                   | -0.36         |
| Ni                                   | -0.19         |
| Cu                                   | -0.099        |
| Zn                                   | -0.77         |
| Zr                                   | -0.67         |
| Nb                                   | -1.06         |
| Mo                                   | -1.02         |
| Tc                                   | -0.88         |
| Ru                                   | -0.61         |
| Rh                                   | -0.25         |
| Pd                                   | -0.24         |
| Ag                                   | 0.35          |
| Cd                                   | -0.63         |
| Ta                                   | -1.22         |
| W                                    | -1.20         |
| Re                                   | -1.04         |
| Os                                   | -0.75         |
| Ir                                   | -0.61         |
| Pt                                   | -0.43         |
| Au                                   | 0.28          |

Table S2.  $\Delta G^*NOH$ ,  $\Delta G^*NHO$  and  $\Delta G^*NH_3$  of all SACs

| SACs                                 | $\Delta G^*NOH$ | $\Delta G^*NHO$ | $\Delta G^*NH_3$ |
|--------------------------------------|-----------------|-----------------|------------------|
| MoS <sub>2</sub> _N <sub>3</sub> _Sc | 1.04            | -0.39           | -0.95            |
| Ti                                   | 0.53            | -0.33           | -0.62            |
| V                                    | 0.43            | 0.16            | 0.08             |
| Cr                                   | 0.72            | 0.81            | -0.40            |
| Mn                                   | 1.00            | 0.82            | 0.39             |
| Fe                                   | 1.27            | 0.81            | -0.88            |
| Co                                   | 1.27            | 0.71            | -0.91            |
| Ni                                   | 1.32            | 0.44            | -1.19            |
| Cu                                   | 0.97            | 0.03            | -1.18            |
| Zn                                   | 0.84            | -0.01           | -1.06            |

|    |      |       |       |
|----|------|-------|-------|
| Zr | 0.63 | -0.46 | -0.04 |
| Nb | 0.36 | -0.20 | 0.23  |
| Mo | 0.53 | 0.49  | 0.36  |
| Tc | 0.86 | 0.77  | -0.52 |
| Ru | 0.79 | 0.62  | -0.72 |
| Rh | 0.84 | 0.73  | -1.14 |
| Pd | 0.95 | 0.02  | -1.77 |
| Ag | 1.22 | 0.02  | -1.61 |
| Cd | 1.01 | -0.06 | -1.05 |
| Ta | 0.32 | -0.23 | 0.42  |
| W  | 0.44 | 0.18  | 0.16  |
| Re | 0.92 | 0.90  | -0.12 |
| Os | 0.76 | 0.75  | -0.63 |
| Ir | 1.19 | 0.81  | -1.34 |
| Pt | 1.10 | 0.32  | -2.09 |
| Au | 1.43 | 0.21  | -1.52 |

Table S3. Rate-determining steps and thermodynamic energy barriers( $\Delta G_{\max}$ ) of all SACs

| SACs                                 | Rate-determining step | $\Delta G_{\max}$ |
|--------------------------------------|-----------------------|-------------------|
| MoS <sub>2</sub> _N <sub>3</sub> _Sc | *NHOH                 | 0.177             |
| Ti                                   | *NHOH                 | 0.214             |
| V                                    | *NHO                  | 0.162             |
| Cr                                   | *NHO                  | 0.811             |
| Mn                                   | *NHO                  | 0.818             |
| Fe                                   | *NHO                  | 0.812             |
| Co                                   | *NHO                  | 0.710             |
| Ni                                   | *NHO                  | 0.436             |
| Cu                                   | *NHO                  | 0.028             |
| Zn                                   | *NH <sub>2</sub> O    | -0.013            |
| Zr                                   | *NH <sub>3</sub>      | -0.037            |
| Nb                                   | *NHOH                 | 0.236             |
| Mo                                   | *NHO                  | 0.486             |
| Tc                                   | *NHO                  | 0.773             |
| Ru                                   | *NHO                  | 0.623             |
| Rh                                   | *NHO                  | 0.735             |
| Pd                                   | *NH                   | 0.273             |
| Ag                                   | *NH <sub>2</sub> O    | 0.224             |
| Cd                                   | *NHO                  | -0.062            |
| Ta                                   | *NH <sub>3</sub>      | 0.422             |
| W                                    | *NHOH                 | 0.217             |

|    |      |       |
|----|------|-------|
| Re | *NHO | 0.897 |
| Os | *NHO | 0.746 |
| Ir | *NHO | 0.811 |
| Pt | *NHO | 0.323 |
| Au | *NHO | 0.214 |

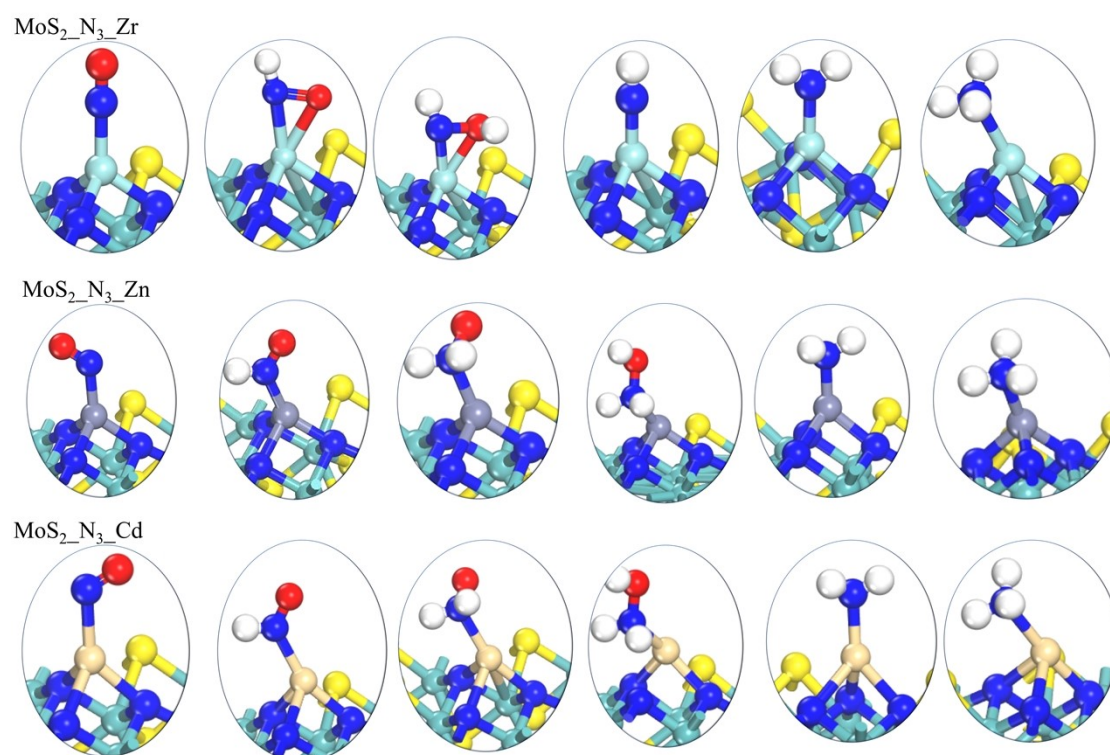

Figure S1. Structural evolution of NORR reaction processes

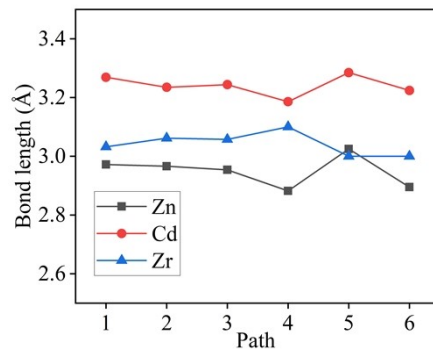

Figure S2. TM-Mo length evolution occurs in three catalyst reaction paths

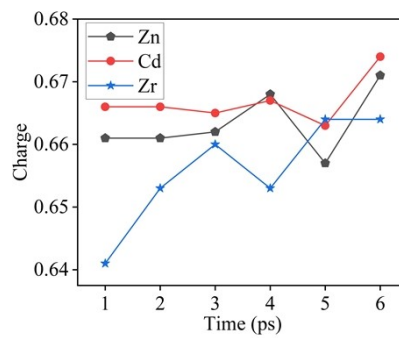

Figure S3. Charge evolution of Mo atom occurs in three catalyst reaction paths

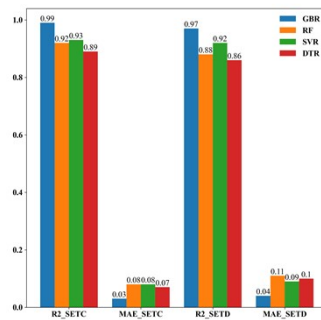

Figure S4.  $R^2$  and MAE obtained by regression training of four machine learning models

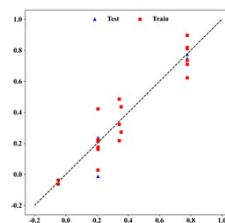

Figure S5. Regression line based on DTR method

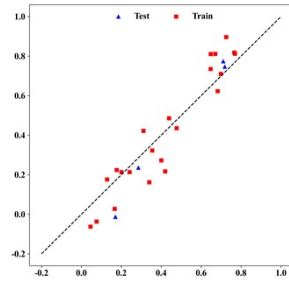

Figure S6. Regression line based on RF method

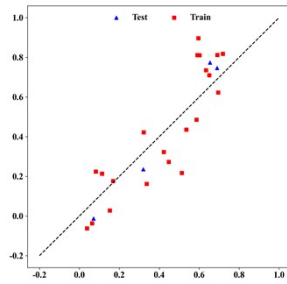

Figure S7. Regression line based on SVR method
